# Supplementary material
Source: PubMed Central journal article supplement (PMC528763)

C24

Kas

Wej

Ts

Ber

Sah

Sha

Van

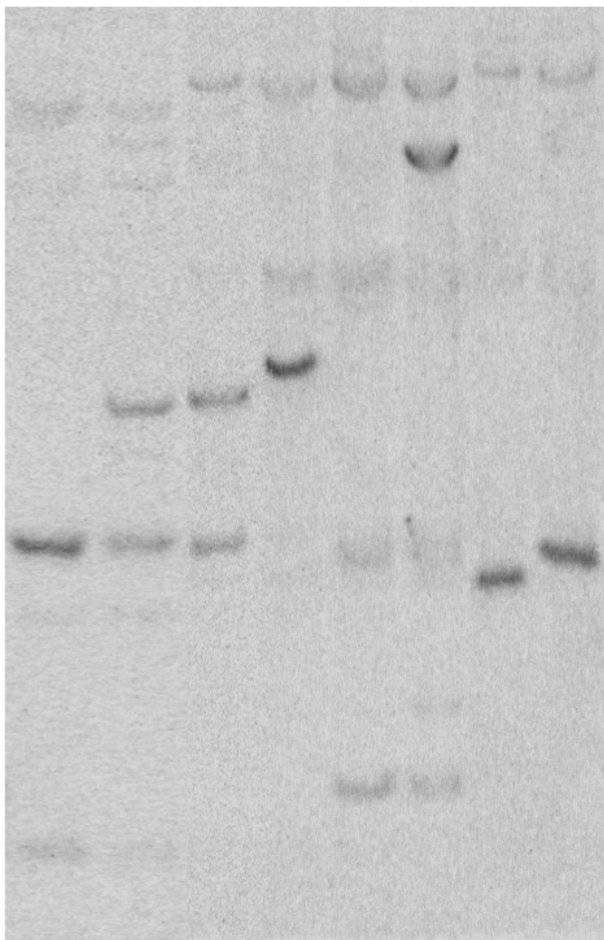

Supplement: pnas_101_45_16070__1.pdf [file pnas_101_45_16070__1.pdf]
